# Supplementary material
Source: Springer Nature journal article supplement (https://www.springermedizin.de/resource/supplementary/12889_2014_6536_MOESM3_ESM.pdf/9498484)
Supplement: MOESM3 [file 9498484]

Year 2005  
n=10041

Year 2009  
n=8284

Consented  
13279 (72%)

Blood samples  
12 726 (69%)

Questionnaires  
12 658 (69%)

Blood sample AND questionnaire data  
12 419 (68%)

Undetected CD  
n=238

Potential CD  
n=54

Diagnosed CD  
n=90

Without CD  
n=12 037
